# Supplementary material for: Comparative Analysis of Biological Characteristics among P0 Proteins from Different Brassica Yellows Virus Genotypes
Source: MDPI journal article supplement (doi:10.3390/biology10111076), 2021-10-21
Supplement: s1 [file s1]

**Table S1.** Sequences of primers used in this study.

| Primer       | Sequence <sup>a</sup> (5'-3') | Note                                      |
|--------------|-------------------------------|-------------------------------------------|
| BrBP0XhoF    | CTCGAGATGCAATTCATTGCTCAC      | pGD-P0 <sup>BrB</sup> -3Flag construction |
| P0ApaR       | TATGGGCCCTAGCTCCCAAAACCCCTTCG |                                           |
| BrCP0XhoF    | CTCGAGATGCAATTTGTTGCTCAC      | pGD-P0 <sup>BrC</sup> -3Flag construction |
| P0ApaR       | TATGGGCCCTAGCTCCCAAAACCCCTTCG |                                           |
| P0I56LF      | TGATATTTTTCTTCGCTCTC          | pGD-I56L-3Flag construction               |
| P0I56LR      | ATCTTGAATTCATTGTTGCG          |                                           |
| P0V70IF      | ACCACATCCACGATGACGTT          | pGD-V70I-3Flag construction               |
| P0V70IR      | CTCCGAGAAGGAGAGGAAGC          |                                           |
| P0T152IF     | TCTATCTGGACTAGAGATGC          | pGD-T152I-3Flag construction              |
| P0T152IR     | CAGAAATCGCTGGAAATGTT          |                                           |
| P0R159EF     | TGAAGAACGCCTCTTTCCTG          | pGD-R159E-3Flag construction              |
| P0R159ER     | GCATCTCTAGTCCAAGTAGA          |                                           |
| P0P163SF     | CTCTTTTCTGGCTGTCGAGA          | pGD-P163S-3Flag construction              |
| P0P163SR     | GCGTCTTTCAGCATCTCTAG          |                                           |
| P0V181LF     | GCTCGCTAATCTTGGCGAGC          | pGD-V181L-3Flag construction              |
| P0V181LR     | TCCACAAGCGTGTGAGACCC          |                                           |
| P0D191GF     | TATGGTGGCTGCTGAGCAAT          | pGD-D191G-3Flag construction              |
| P0D191GR     | ACGCGGAGAAGCTCGCCAAC          |                                           |
| P0Q193EF     | GATGAGGAATTTCACTACTC          | pGD-Q193E-3Flag construction              |
| P0Q193ER     | AGCCACCATAACGCGGAGAA          |                                           |
| P0S197PF     | TTCAACAACCCCGTCTTCTG          | pGD-S197P-3Flag construction              |
| P0S197PR     | ATTGCTCATCAGCCACCATA          |                                           |
| P0H227YF     | ATCTGGATTATTTTCGATTGC         | pGD-H227Y-3Flag construction              |
| P0H227/228YR | TGGCAATCCTCCAAAAAGAA          |                                           |
| P0F228LF     | ATCTGGATCATCTCGATTGC          | pGD-F228L-3Flag construction              |
| P0H227/228YR | TGGCAATCCTCCAAAAAGAA          |                                           |
| 18S-1        | GCAAGACCGAAACTCAAAGG          | RT-qPCR detection for 18S ribosomal RNA   |

|              |                                           |                                    |
|--------------|-------------------------------------------|------------------------------------|
|              |                                           | <i>gene</i>                        |
| 18S-2        | TGTTCATATGTCAAGGGCTGG                     |                                    |
| 212F22       | TTAGCAGCCGTCATGAAATCGT                    |                                    |
| 341R23       | GGCGTAGAACCTTTAACCTGGGA                   | RT-qPCR detection for <i>NbPR1</i> |
| BrAP0ClaF    | <b>CCATCGAT</b> ATGCAATTTGTAGCTC          |                                    |
| BrAP0SalhisR | GCGT <b>CGACT</b> TAATGATGGTGGTGGTGGTGTAC | PVX.P0 <sup>BrA</sup> construction |
|              | AAACATTTC                                 |                                    |
| PEM2797F     | ATGTCAATAACGACGAGCGC                      |                                    |
| PEM3202R     | CCAATGCAATCGAGTAGGGT                      | RT-PCR detection for PEMV 2        |

---

<sup>a</sup> The underlined letters represent the site of mutation. The bold font represents the restriction sites.
